# Supplementary material for: A poly(polyoxometalate)-b-poly(hexanoic acid) block copolymer: synthesis, self-assembled micelles and catalytic activity
Source: Royal Society of Chemistry journal article supplement (doi:10.1039/c5py00855g), 2015-01-01
Supplement: c5py00855g1.pdf [file c5py00855g1.pdf]

## Supplemental Information

for

### A Poly(polyoxometalate)-*b*-Poly(hexanoic acid) Block Copolymer: Synthesis, Self-Assembled Micelles and Catalytic Activity

Wen-Ke Miao, Ang Yi, Yu-Kun Yan, Da Chen, Li-Jun Ren, Chun-Hong Wang, Wei Wang\*

Center for Synthetic Soft Materials, Key Laboratory of Functional Polymer Materials of the Ministry of Education, Institute of Polymer Chemistry, Nankai University, and Collaborative Innovation Center of Chemical Science and Engineering (Tianjin), Tianjin 300071, China

#### Figures

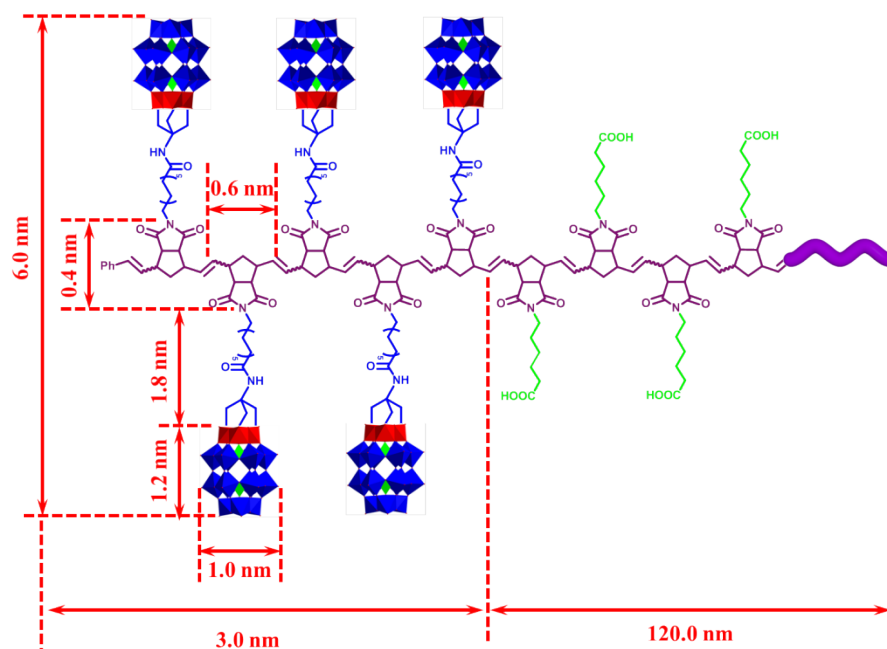

**Fig. S1.** Dimensions of H-BCP. Dimensions of  $V_3POM \cdot 6TBA$  and polynorbornene were obtained from single crystal data and ChemDraw software respectively.

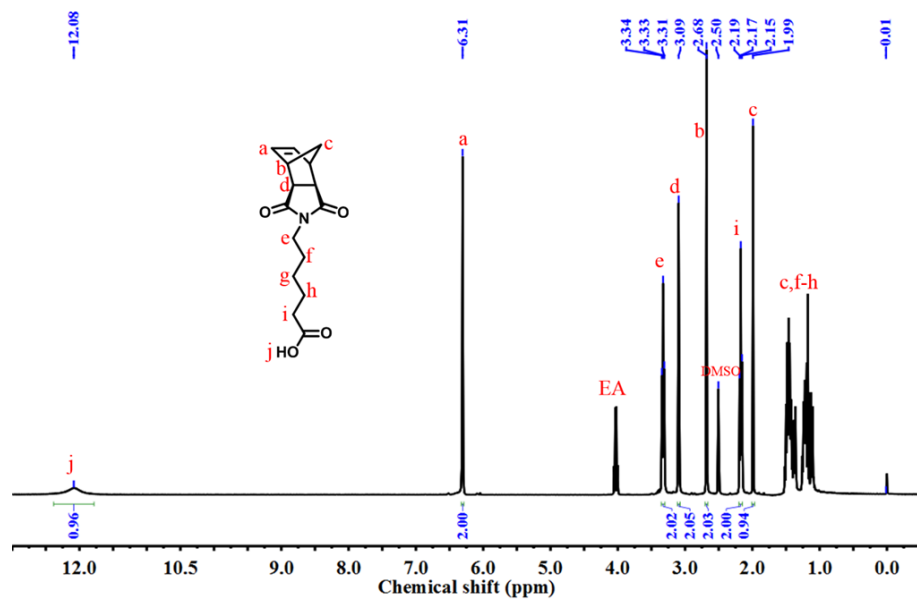

Fig. S2.  $^1\text{H}$  NMR spectrum of monomer 2.

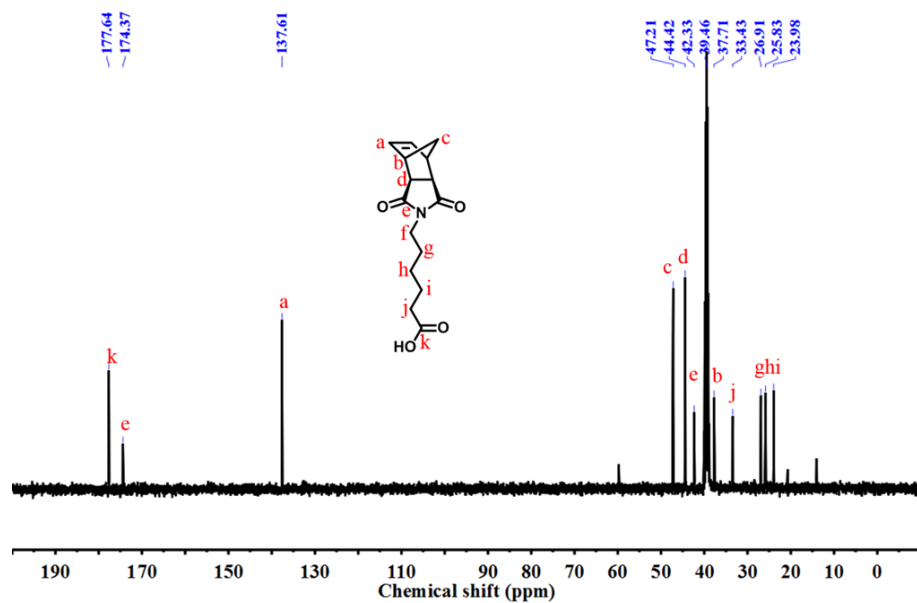

Fig. S3.  $^{13}\text{C}$  NMR spectrum of monomer 2.

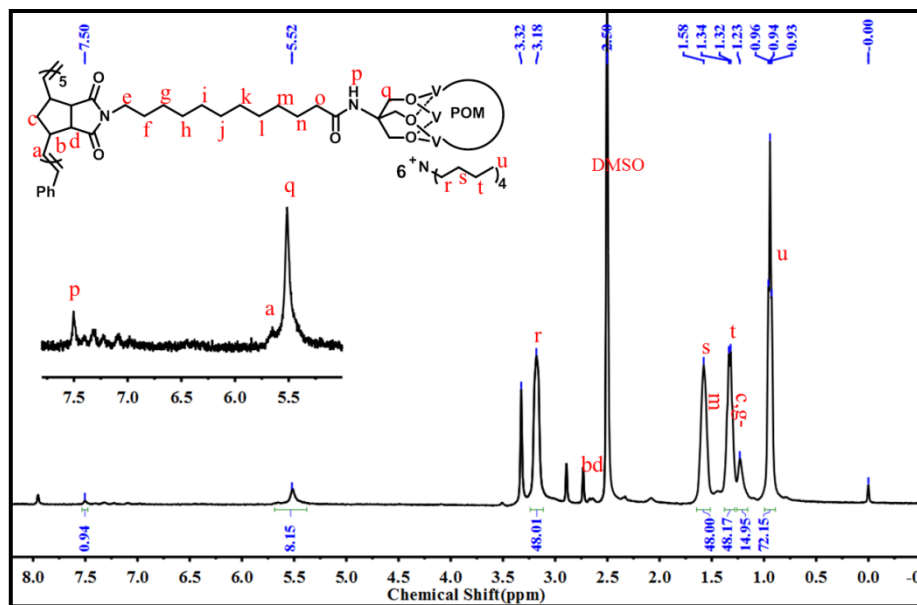

Fig. S4. <sup>1</sup>H NMR spectrum of poly(POM)<sub>5</sub>.

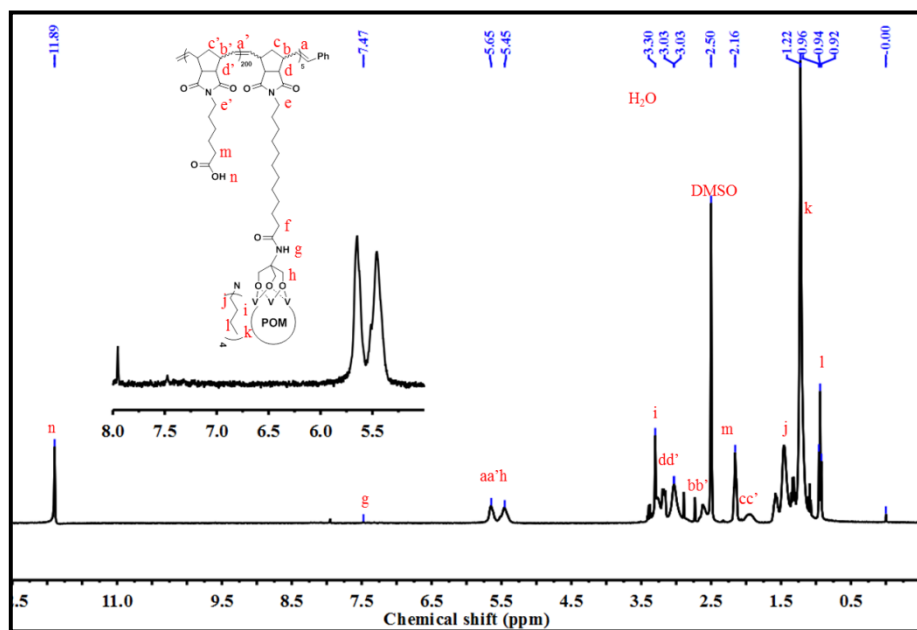

Fig. S5. <sup>1</sup>H NMR spectrum of the H-BCP.

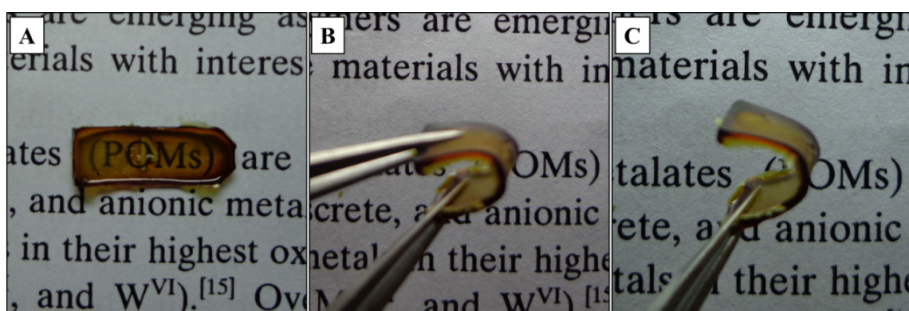

**Fig. S6.** Three photographs showing ductility of a solid sample of the H-BCP.

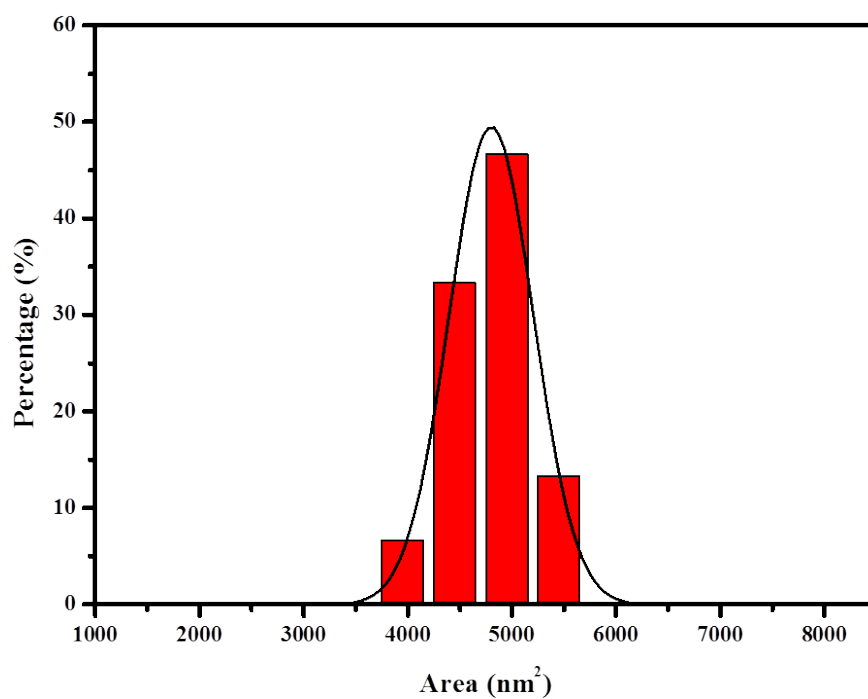

**Fig. S7.** Area distribution histogram of the discrete S-aggregates in Fig. 2A. The average area of one S-aggregates is  $4839 \pm 403$  nm<sup>2</sup>.

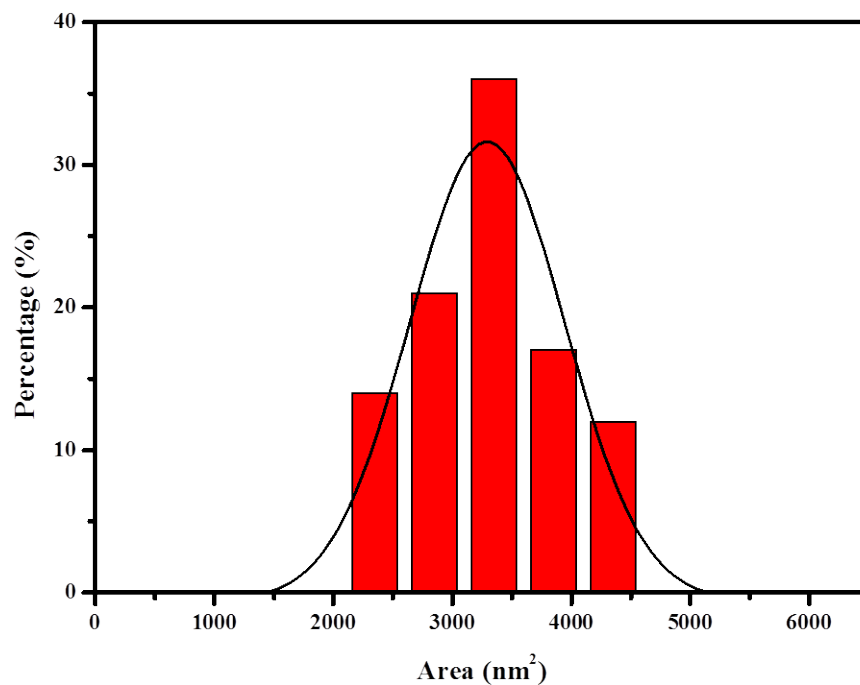

**Fig. S9.** Area distribution histogram of the gathered aggregates in Fig. 2B. The average area of one aggregate is  $3236 \pm 547 \text{ nm}^2$ .

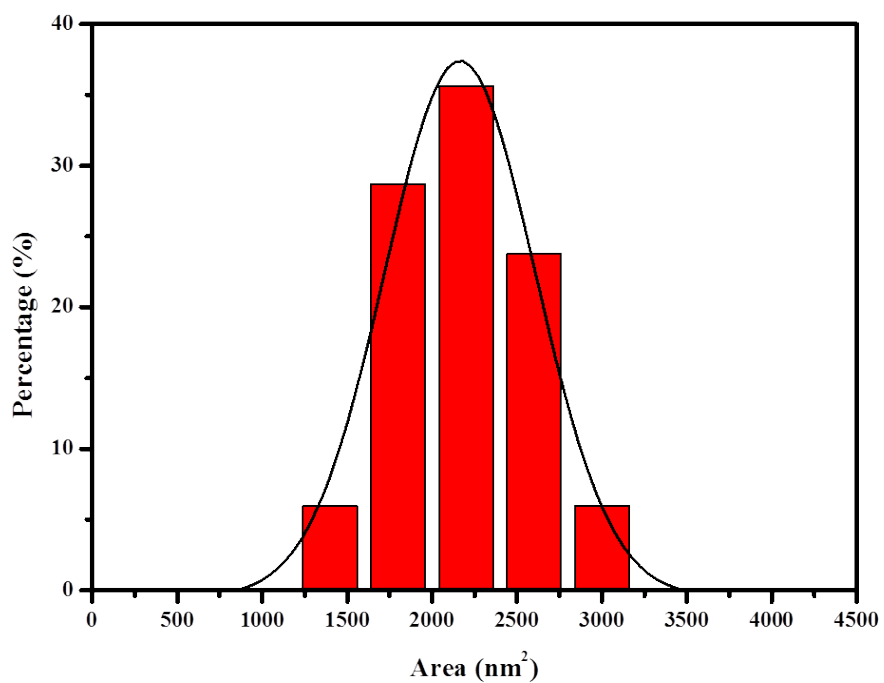

**Fig. S10.** Area distribution histogram of the close-packed aggregates in Fig. 2C. The average area of one hexagon is  $2150 \pm 381 \text{ nm}^2$ .
